# Supplementary material
Source: PubMed Central journal article supplement (PMC5291730)
Supplement: jciinsight-2-90617-s001.pdf [file jciinsight-2-90617-s001.pdf]

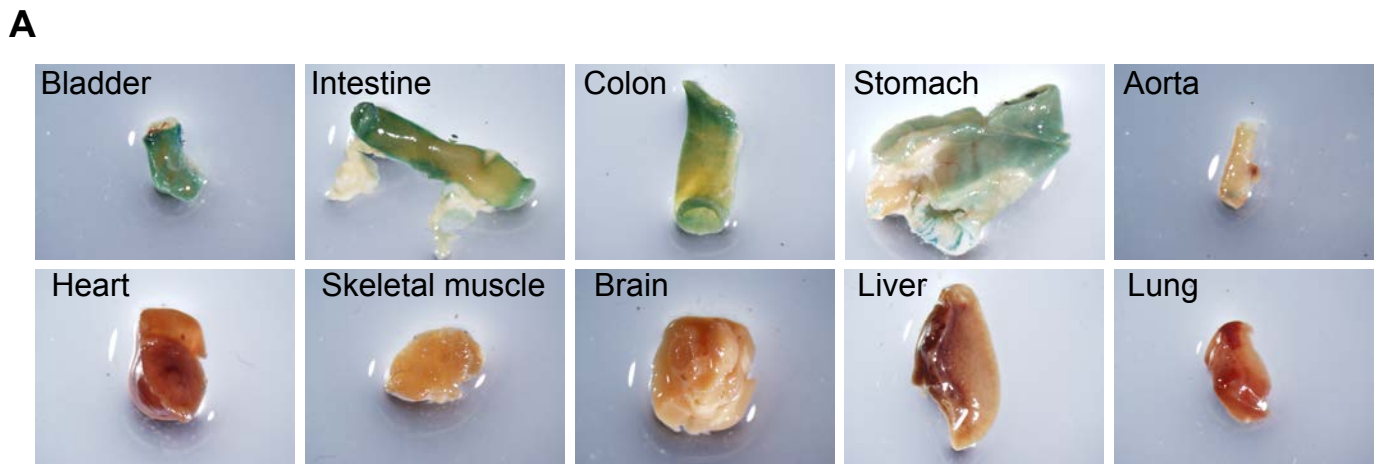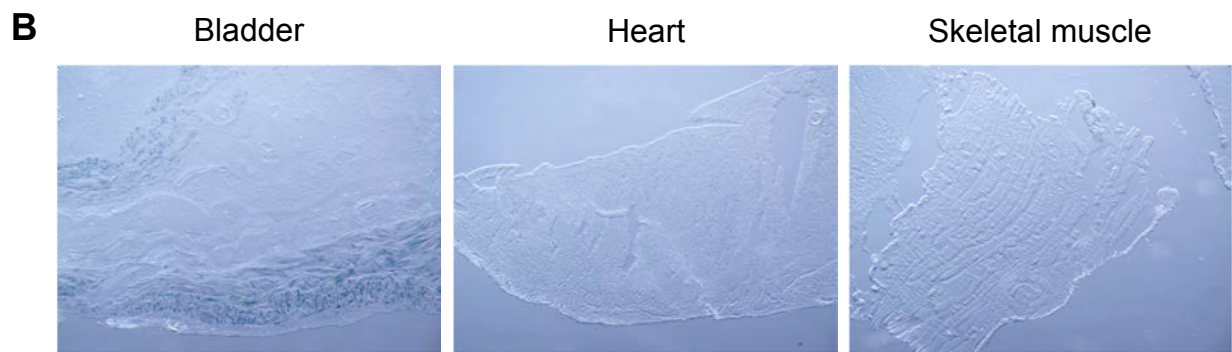

**Supplementary Figure 1:** Validation of tissue specificity of SM22 $\alpha$ -CreER<sup>T2</sup>. **A.** Organs were harvested from 9 week old SM22 $\alpha$ -CreER<sup>T2</sup>;LacZ double heterozygous mice that had been administered 4-OHT (i.p., 0.25 mg/d for 5 d) and stained with X-Gal. **B.** Frozen sections of bladder, heart and skeletal muscle from SM22 $\alpha$ -CreER<sup>T2</sup>;LacZ double heterozygous mice treated as in A were stained with X-Gal and imaged using a 5X objective. X-Gal signal was restricted to the detrusor smooth muscle of the bladder.
